# Supplementary material for: Morphological signatures of actin organization in single cells accurately classify genetic perturbations using CNNs with transfer learning
Source: Royal Society of Chemistry journal article supplement (doi:10.1039/d2sm01000c), 2022-01-01
Supplement: d2sm01000c1.pdf [file d2sm01000c1.pdf]

**Supplementary Table 1.** Classification accuracy using transfer learning with ResNet-50.

| Classification Task                                   | CNN Accuracy | Control Experiment Accuracy |
|-------------------------------------------------------|--------------|-----------------------------|
| Normal versus Akt <sup>myr</sup> on Glass             | 93.12%       | 50.38%                      |
| Normal versus Mek <sup>DD</sup> on Glass              | 94.85%       | 50.04%                      |
| Normal versus Ras <sup>v12</sup> on Glass             | 95.20%       | 49.77%                      |
| Normal versus Akt <sup>myr</sup> on FN <sup>a</sup>   | 91.79%       | 50.56%                      |
| Normal versus Mek <sup>DD</sup> on FN                 | 93.04%       | 51.39%                      |
| Normal versus Ras <sup>v12</sup> on FN                | 96.56%       | 49.97%                      |
| Akt <sup>myr</sup> versus Mek <sup>DD</sup> on Glass  | 84.03%       | 48.99%                      |
| Akt <sup>myr</sup> versus Ras <sup>v12</sup> on Glass | 85.71%       | 51.97%                      |
| Ras <sup>v12</sup> versus Mek <sup>DD</sup> on Glass  | 85.66%       | 51.21%                      |
| Akt <sup>myr</sup> versus Mek <sup>DD</sup> on FN     | 83.33%       | 52.39%                      |
| Akt <sup>myr</sup> versus Ras <sup>v12</sup> on FN    | 87.85%       | 48.97%                      |
| Ras <sup>v12</sup> versus Mek <sup>DD</sup> on FN     | 80.53%       | 49.00%                      |
| Normal ARPE19 on Glass versus on FN                   | 70.29%       | 50.64%                      |
| Akt <sup>myr</sup> on Glass versus on FN              | 85.39%       | 50.50%                      |
| Mek <sup>DD</sup> on Glass versus on FN               | 61.34%       | 48.12%                      |
| Ras <sup>v12</sup> on Glass versus on FN              | 82.60%       | 52.08%                      |
| Multiclass: All ARPE19 Cell Lines on FN               | 79.97%       | 24.18%                      |
| Multiclass: All ARPE19 Cell Lines on Glass            | 82.18%       | 25.03%                      |
| MDA-MB-453 WT <sup>b</sup> versus SUM159PT WT         | 91.48%       | 46.47%                      |
| MDA-MB-453 Cof KD <sup>c</sup> versus SUM159PT Cof KD | 86.62%       | 50.43%                      |
| MDA-MB-453 WT versus MDA-MB-453 Cof KD                | 81.07%       | 48.97%                      |
| SUM159PT WT versus SUM159PT Cof KD                    | 81.90%       | 45.91%                      |
| All TNBC WT versus All TNBC Cof KD                    | 82.20%       | 50.01%                      |
| MDA-MB-453 WT versus SUM159PT WT – Nuclei             | 76.67%       | 46.96%                      |
| MDA-MB-453 Cof KD versus SUM159PT Cof KD – Nuclei     | 62.27%       | 54.78%                      |
| MDA-MB-453 WT versus MDA-MB-453 Cof KD – Nuclei       | 67.50%       | 51.38%                      |
| SUM159PT WT versus SUM159PT Cof KD – Nuclei           | 71.43%       | 44.72%                      |
| All TNBC WT versus All TNBC Cof KD – Nuclei           | 67.60%       | 46.74%                      |

<sup>a</sup>FN = Fibronectin-coated Glass

<sup>b</sup>WT = Wild Type

<sup>c</sup>Cof KD = Cofilin KD

**Supplementary Table 2.** Comparison of classification accuracy scores using the original grayscale images versus binarized cell images.

| Classification Task                          | Original Images |                             | Binarized Images |                             |
|----------------------------------------------|-----------------|-----------------------------|------------------|-----------------------------|
|                                              | CNN Accuracy    | Control Experiment Accuracy | CNN Accuracy     | Control Experiment Accuracy |
| Normal ARPE19 versus Akt <sup>myr</sup>      | 91.72%          | 48.33%                      | 72.89%           | 47.17%                      |
| Normal ARPE19 versus Mek <sup>DD</sup>       | 93.71%          | 50.15%                      | 68.18%           | 50.79%                      |
| Normal ARPE19 versus Ras <sup>v12</sup>      | 93.91%          | 51.5%                       | 68.81%           | 50.55%                      |
| Akt <sup>myr</sup> versus Mek <sup>DD</sup>  | 85.56%          | 50.45%                      | 62.50%           | 49.83%                      |
| Akt <sup>myr</sup> versus Ras <sup>v12</sup> | 87.62%          | 51.85%                      | 64.19%           | 50.13%                      |
| Ras <sup>v12</sup> versus Mek <sup>DD</sup>  | 87.33%          | 49.42%                      | 66.31%           | 50.35%                      |
| MDA-MB-453 WT versus SUM159PT WT             | 91.48%          | 46.47%                      | 68.15%           | 48.86%                      |
| MDA-MB-453 Cof KD versus SUM159PT Cof KD     | 86.62%          | 50.43%                      | 81.82%           | 47.39%                      |
| MDA-MB-453 WT versus MDA-MB-453 Cof KD       | 81.07%          | 48.97%                      | 68.93%           | 52.08%                      |
| SUM159PT WT versus SUM159PT Cof KD           | 81.90%          | 45.91%                      | 70.00%           | 50.00%                      |
| All TNBC WT versus All TNBC Cof KD           | 82.20%          | 50.01%                      | 65.40%           | 49.40%                      |
